# Supplementary material for: The Management of Acute Colonic Diverticulitis in the COVID-19 Era: A Scoping Review
Source: MDPI journal article supplement (doi:10.3390/medicina57101127), 2021-10-18
Supplement: s1 [file s1]

**Table S1.** Excluded full texts (not reported data about acute diverticulitis).

| <b>Author</b>   | <b>Journal</b>           | <b>Published Online</b> |
|-----------------|--------------------------|-------------------------|
| Collard         | Colorectal Disease       | 16 June 2020            |
| Fu              | Br J Surg                | 3 June 2020             |
| Changzheng      | ANZ J Surg               | 28 May 2020             |
| Bonapasta       | J Trauma Acute Care Surg | 21 May 2020             |
| Wakam           | Int J Surg               | 19 May 2020             |
| Coppola         | Int J Surg               | 19 May 2020             |
| Shanker         | Int J Surg               | 19 May 2020             |
| Cano-Valderrama | Br J Surg                | 14 May 2020             |
| Pata            | J Trauma Acute Care Surg | 13 May 2020             |
| Yao             | Dis Colon Rectum         | 13 May 2020             |
| Yeo             | Br J Surg                | 7 May 2020              |
| Huda            | Int J Surg               | 4 May 2020              |
| Liu             | Int J Surg               | 4 May 2020              |
| Tan             | Ann Coloproctol          | 30 April 2020           |
| Hogan           | Br J Surg                | 24 April 2020           |
| Faccincani      | Eur J Trauma Emerg Surg  | 20 April 2020           |
| Coimbra         | Eur J Trauma Emerg Surg  | 20 April 2020           |
| Gao             | Ann Surg                 | 13 April 2020           |
| Liu             | Indian J Surg            | 11 April 2020           |
| Ahmed           | J Am Coll Surgeon        | 9 April 2020            |
| Slim            | J Visc Surg              | 7 April 2020            |
| Gallo           | J Invest Surg            | 5 April 2020            |
| Lisi            | Dis Colon Rectum         | 30 March 2020           |
| Kurihara        | J Trauma Acute Care Surg | 18 March 2020           |
| Pellino         | Dis Colon Rectum         | 17 March 2020           |
